# Supplementary material for: Chromatin‐bound cGAS is an inhibitor of DNA repair and hence accelerates genome destabilization and cell death
Source: PubMed Central journal article supplement (PMC6826206; doi:10.15252/embj.2019102718), 2019-09-23

Figure 1D

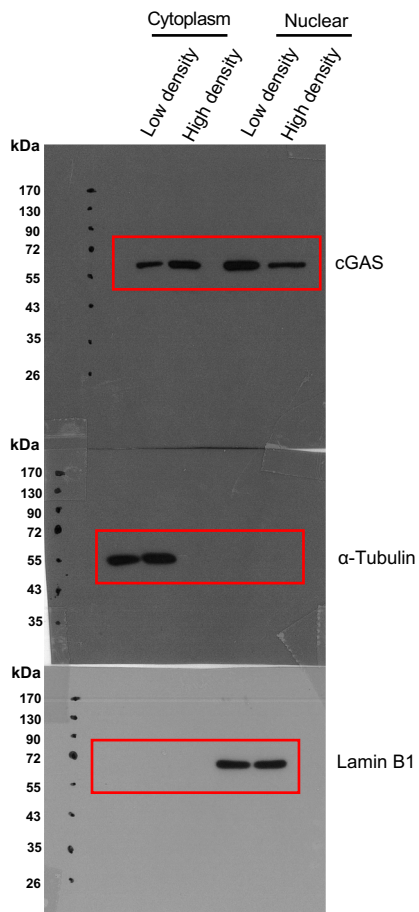

Figure 1E

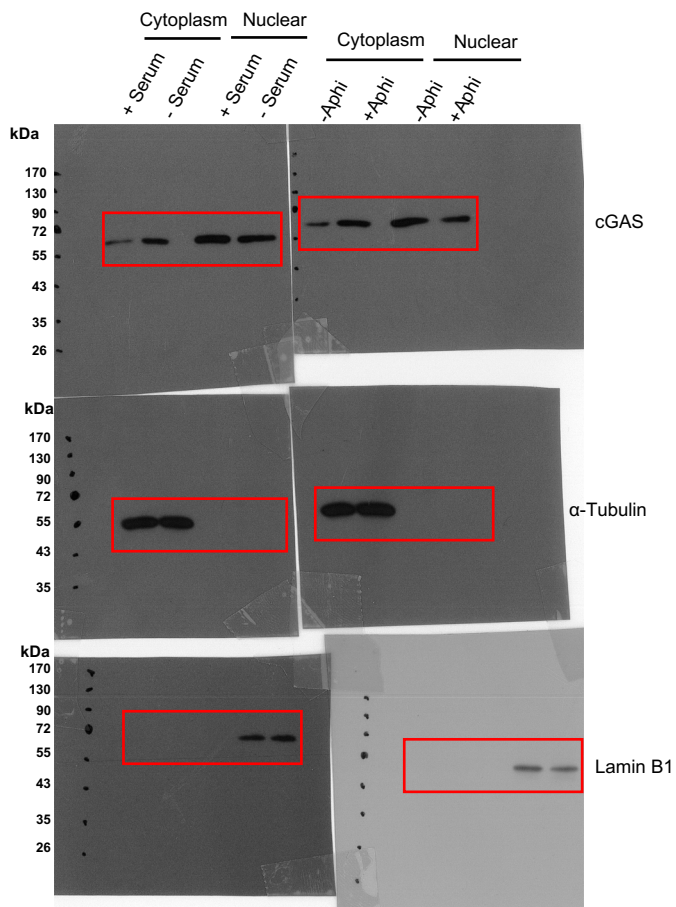

Figure 1F

Figure 1A

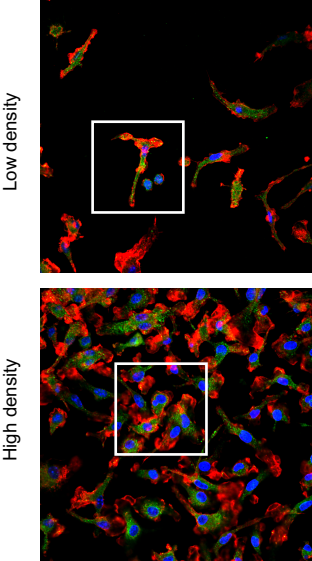

Figure 1B

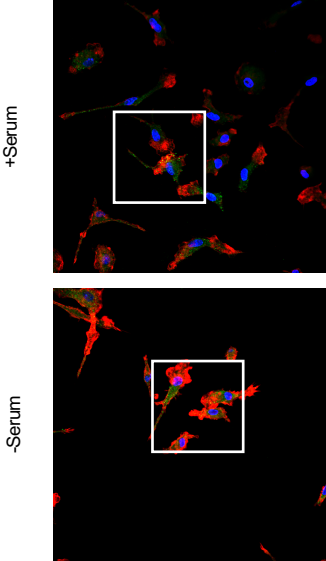

Figure 1C

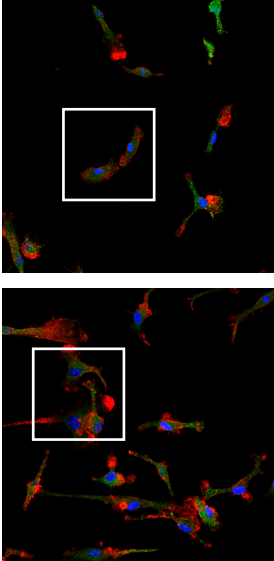

Supplement: EMBJ-38-e102718-s003.pdf [file EMBJ-38-e102718-s003.pdf]
