# Supplementary material for: Chromatin‐bound cGAS is an inhibitor of DNA repair and hence accelerates genome destabilization and cell death
Source: PubMed Central journal article supplement (PMC6826206; doi:10.15252/embj.2019102718), 2019-09-23

**Figure 6C**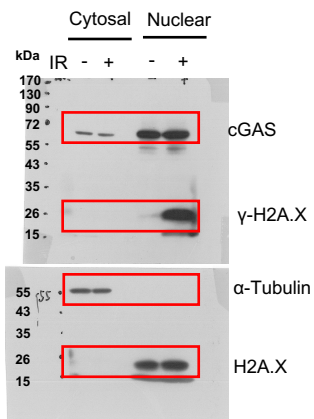**Figure 6D**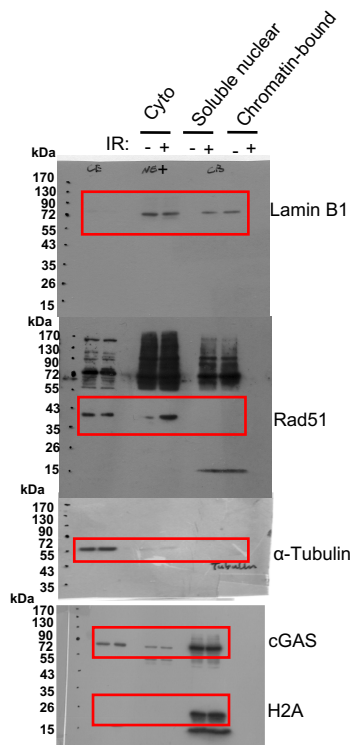**Figure 6E**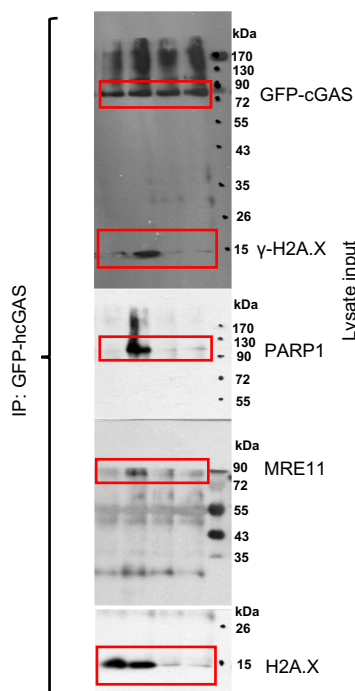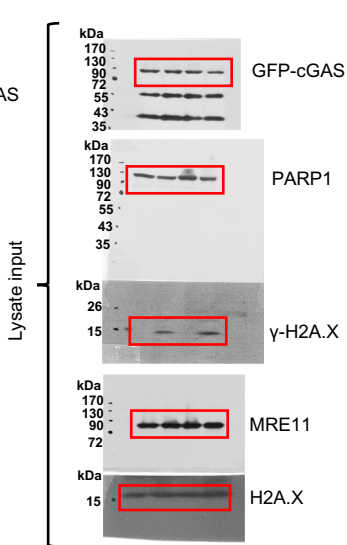**Figure 6G**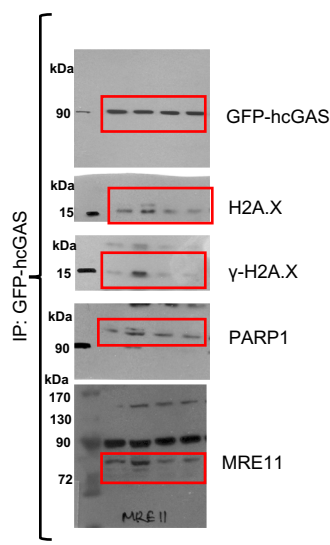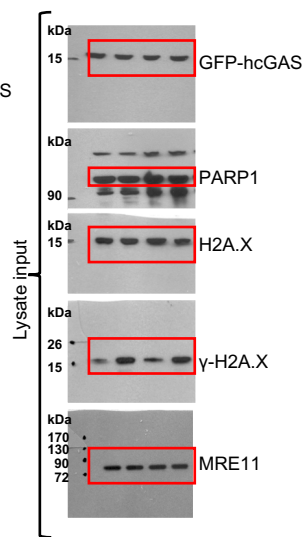

Figure 6A

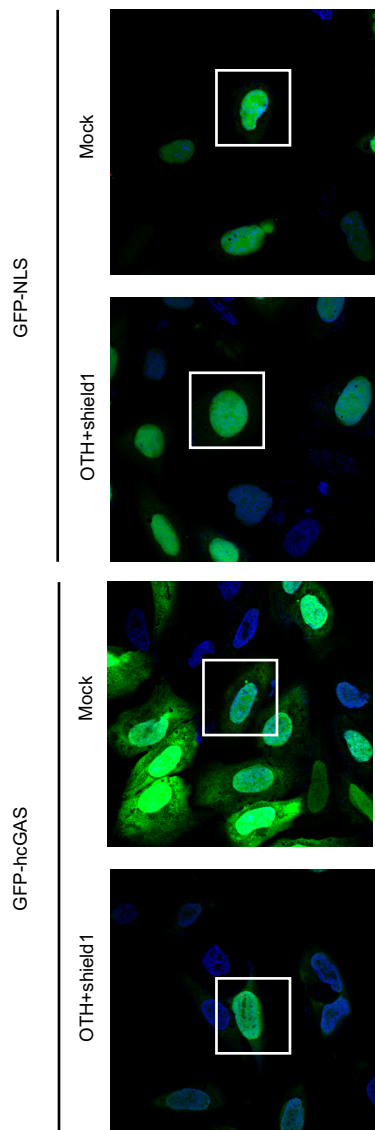

Figure 6B

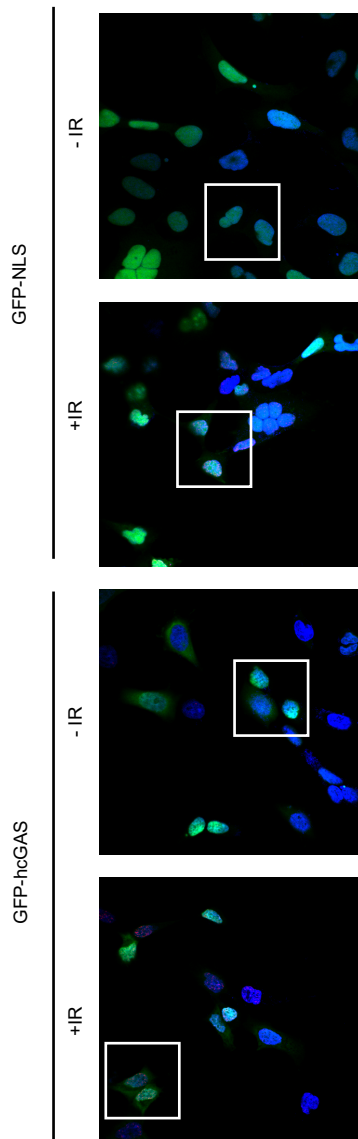

Supplement: EMBJ-38-e102718-s007.pdf [file EMBJ-38-e102718-s007.pdf]
