# Supplementary material for: Chromatin‐bound cGAS is an inhibitor of DNA repair and hence accelerates genome destabilization and cell death
Source: PubMed Central journal article supplement (PMC6826206; doi:10.15252/embj.2019102718), 2019-09-23

Figure 7C

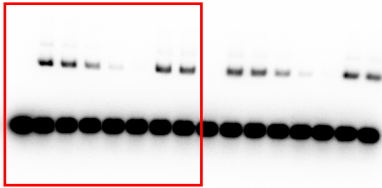

Figure 7E

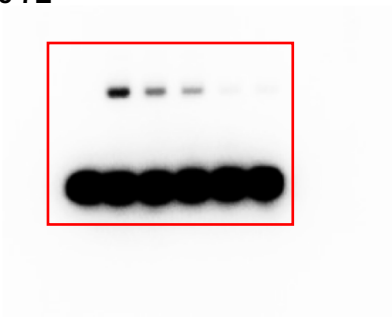

Figure 7A

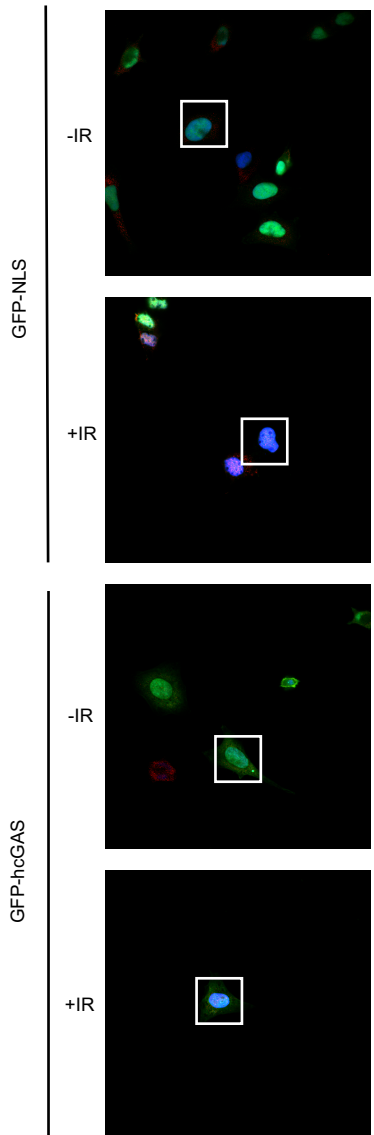

Supplement: EMBJ-38-e102718-s008.pdf [file EMBJ-38-e102718-s008.pdf]
