# Supplementary material for: Chromatin‐bound cGAS is an inhibitor of DNA repair and hence accelerates genome destabilization and cell death
Source: PubMed Central journal article supplement (PMC6826206; doi:10.15252/embj.2019102718), 2019-09-23
Supplement: EMBJ-38-e102718-s011.pdf [file EMBJ-38-e102718-s011.pdf]

## Chromatin-bound cGAS is an inhibitor of DNA repair hence accelerates genome destabilization and cell death

Hui Jiang, Xiaoyu Xue, Swarupa Panda, Ajinkya Kawale, Richard M. Hooy, Fengshan Liang, Jungsan Sohn, Patrick Sung and Nelson O. Gekara.

---

### Review timeline:

|                     |                                |
|---------------------|--------------------------------|
| Submission date:    | 18 <sup>th</sup> June 2019     |
| Editorial Decision: | 12 <sup>th</sup> July 2019     |
| Revision received:  | 5 <sup>th</sup> August 2019    |
| Editorial Decision: | 12 <sup>th</sup> August 2019   |
| Revision received:  | 19 <sup>th</sup> August 2019   |
| Accepted:           | 2 <sup>nd</sup> September 2019 |

---

Editor: Hartmut Vodermaier

### Transaction Report:

(Note: With the exception of the correction of typographical or spelling errors that could be a source of ambiguity, letters and reports are not edited. The original formatting of letters and referee reports may not be reflected in this compilation.)

1st Editorial Decision

12<sup>th</sup> July 2019

---

Thank you again for submitting your nuclear cGAS modulating homologous recombination repair to The EMBO Journal. We have now received the below reports from two expert referees, who both consider your demonstration of continuous cGAS presence on chromatin and role in accelerating genome destabilization and cell death highly interesting and generally well-demonstrated. We shall therefore be happy to offer publication after addressing of a limited number of specific issues noted by the reviewers. As you will see, referee 1 raises three points regarding the DNA repair/recombination assays, of which especially point (a) should be experimentally addressed, and points (b) and (c) requiring at least further clarification and potential re-interpretation (although any additional data to decisively sort out these issues would certainly be helpful!). For referee 2, it will be important to directly address major points 3-5, while commenting/discussing should be sufficient for points 1 and 2.

-----

### REFeree REPORTS

Referee #1:

Chromatin-bound cGAS is an inhibitor of DNA repair hence accelerates genome destabilization and cell death

cGAS is an immune receptor that recognizes cytosolic DNA leading to a potent immune response via STING-IRF3-type I IFN signaling. Recognition of aberrant chromatin in micronuclei by cGAS links genome instability to the innate immune response. Genome integrity is ensured by accurate repair of DNA double-stranded breaks. Here Jiang et al. show that cGAS is constantly present in the nucleus in a chromatin-bound state, while acting as a negative regulator of HR-mediated DNA repair leading to increased micronuclei formation and cell death.

Overall this work is interesting and expands our understanding of the role of chromatin-associated nuclear cGAS. The data demonstrating that cGAS is constitutively present in the nucleus and cytosol is convincing and demonstrated by microscopy and clean fractionation assays. Especially exciting are the findings that next to cGAS immune activation via micronuclei, cGAS plays a crucial role in accelerating genome destabilization and cell death in vitro and in vivo. These important data open up the question how nuclear cGAS can promote micronuclei formation upon DNA damage. Jiang et al. suggest a mechanism, where constitutively chromatin-bound cGAS is directly impairing access of DNA repair factors, such as RAD51, to the damaged DNA. Overall, the data are solid, and the conclusions generally supported by the experimental data. I am very favorable for publishing this study and only have a few points:

#### Experimental points:

- a) The authors perform biochemical assays to reveal the mechanism behind HR-mediated DNA repair inhibition using the cGAS catalytic domain (Figure 6). In contrast, cell assays are based on full-length cGAS. To have these two sets of data comparable, it would be important to see if the cGAS catalytic domain is sufficient to inhibit DNA repair in cells as well.
- b) Specific blocking of D-loop formation by cGAS in vitro (Fig. S8). I find the conclusions of these experiments a bit premature. First, the conclusions of the authors that cGAS and MHF have similar binding affinities is not entirely justified, because the presented data may just well reflect a titration of binding sites (thus underestimating the affinity). In fact, the curve in Fig. S8 looks a bit like a linear slope immediately followed by a plateau which is characteristic for a titration experiment of a tight binder. If the authors want to make that conclusion, perhaps they could use a more quantitative, equilibrium assay such as fluorescence polarization anisotropy?
- c) Specific blocking of D-loop formation by cGAS in vitro (Fig. S8). Along the same lines. I find it rather surprising that MHF does not block D-loop formation at all at a concentration where it robustly binds DNA. Shouldn't there be at least a reduction simply due to competition with Rad51 for the dsDNA? Perhaps the conclusion is the other way around, i.e. MHF specifically allows D-Loop formation even though it is bound by DNA, while cGAS is a mere steric competitor? To draw the conclusion that cGAS "specifically" inhibits D-loop is not yet justified by these experiments.

#### Editorial:

- The introduction is quite brief and more background on the topics concerning this study would be highly beneficial to the general readership.
- Also, rationales behind experiments are sometimes lacking, for instance Figure 1a-c. What is the rationale of studying low and high density cultures and +/- serum?
- "DNA binding zinc finger" C396A/C397A mutant: please rephrase since the effect of the mutant is loss of DNA binding and it is a bit confusing as written.
- P6 "due to the recruitment of these factor to chromatin upon DNA damage". These "factors"?
- Fig. S8E typo: "Proetin"

#### Referee #2:

This manuscript sets out by reporting that a fraction of the cGAS protein - widely believed to be a cytosolic DNA sensor - is actually localised in the cell nucleus. Similar findings have been published recently by others, but these studies generally fell short of providing an explanation for nuclear functions of cGAS. Here, the authors show striking new data from experiments using ionising radiation (IR): cGAS-deficient cells, as well as cGAS knock-out mice, are less susceptible to IR. In cells lacking cGAS, IR induces less DNA damage and less cell death. In cGAS KO mice, IR fails to ablate the bone marrow. These effects are independent of STING and of the enzymatic activity of cGAS to produce cGAMP. The authors go on to show that cGAS blocks homologous recombination DNA repair, by blocking RAD51-coated DNA filaments from invading complementary DNA helices. Overall, the data are convincing, although this reviewer lacks detailed expertise in DNA repair. There are a number of interesting outstanding questions, most notably pertaining to the issue why cGAS is not activated to produce cGAMP under homeostatic conditions if constantly bound to nuclear DNA. However, these questions are probably best addressed in a

separate study. Indeed, the manuscript already reports a wealth of timely and important results that deserve swift publication in EMBO Journal, if the specific comments detailed below can be addressed.

#### Major points

1. Are cGAS-deficient cells also more resistant to other genotoxic stresses, apart from IR? Such data would broaden the study.
2. The authors suggest that cGAS is bound to chromatin "constantly" (Fig 5). Most of the evidence for this comes from experiments with overexpressed, GFP-tagged cGAS. Have the authors estimated how much endogenous cGAS protein molecules a cell contains, relative to the size of its DNA genome? Is cGAS essentially behaving like histones, binding the whole genome? It seems hard to imagine there is enough cGAS protein expressed. Alternatively, does cGAS bind specific regions in the genome, as suggested in PMID 30811988? At a minimum, this reference and PMIDs 30270045 & 28738408, which report assays on chromatin binding by cGAS, should be discussed.
3. In Figs 1F, S1 and S2, it would be helpful to use image analysis software to quantify the amount of nuclear cGAS across a large number of cells.
4. Please provide a supplementary figure outlining the gating strategy for Fig. 3.
5. Please provide protein gels showing purity of the proteins used in the assay shown in Fig. 6.

#### Minor points

6. In the title, please replace "hence" with "and".
7. cGAS is the abbreviation for "cGAMP synthase" or "cyclic GMP-AMP synthase", not "cyclic cGMP-AMP synthase". Please correct abstract and introduction.
8. On page 7, please refer to Fig S9E and S9F (not S10E and S10F)
9. Could the authors provide a reference for BMDMs? Using cells from BMDM cultures at an early timepoint seems unusual. What is the phenotype of these cells?
10. Fig S9 should be moved into the main manuscript to form Fig 7.
11. Please cite and briefly discuss PMID 28279982, which shows that cGAS-STING induce ISGs after IR.
12. Please cite and briefly discuss PMID 30827685, which shows that cGAS is localised at the plasma membrane and suggests that nuclear localization may be an artefact of cell lysate preparation.

1st Revision - authors' response

5<sup>th</sup> August 2019

## Point by point responses to reviewers

We are grateful to this reviewer for the positive comments and constructive suggestions on our manuscript. We have now included the additional data and made all the suggested changes. We feel that their comment have improved the manuscript and hope that it will now be published swiftly in the EMBO Journal. Please see below our detailed response (in plain text) to the specific reviewer comments (highlighted in bold)

### **Referee #1:**

#### **Specific experimental points:**

##### **Point #a:**

**The authors perform biochemical assays to reveal the mechanism behind HR-mediated DNA repair inhibition using the cGAS catalytic domain (Figure 6). In contrast, cell assays are based on full-length cGAS. To have these two sets of data comparable, it would be important to see if the cGAS catalytic domain is sufficient to inhibit DNA repair in cells as well.**

**Response:** We have performed this experiment. The cGAS catalytic domain also inhibits the HR-DNA repair (**Figure EV5B**). Please note that in addition to the cell

based assay (**Figure EV4A, B**), we also provide evidence that the purified full length cGAS and catalytic domain cGAS do inhibit D-loop formation (**Figure 8B, C and I**).

**Points #b & c:**

**b) Specific blocking of D-loop formation by cGAS in vitro (Fig. S8). I find the conclusions of these experiments a bit premature. First, the conclusions of the authors that cGAS and MHF have similar binding affinities is not entirely justified, because the presented data may just well reflect a titration of binding sites (thus underestimating the affinity). In fact, the curve in Fig. S8 looks a bit like a linear slope immediately followed by a plateau which is characteristic for a titration experiment of a tight binder. If the authors want to make that conclusion, perhaps they could use a more quantitative, equilibrium assay such as fluorescence polarization anisotropy?**

**c) Specific blocking of D-loop formation by cGAS in vitro (Fig. S8). Along the same lines. I find it rather surprising that MHF does not block D-loop formation at all at a concentration where it robustly binds DNA. Shouldn't there be at least a reduction simply due to competition with Rad51 for the dsDNA? Perhaps the conclusion is the other way around, i.e. MHF specifically allows D-Loop formation even though it is bound by DNA, while cGAS is a mere steric competitor? To draw the conclusion that cGAS "specifically" inhibits D-loop is not yet justified by these experiments.**

**Response to points b & c:** We thank the reviewer for this point. The point of the MHF experiment was to test whether inhibition of D-loop by cGAS was simply due to its DNA binding, and if so, whether other DNA binding proteins could inhibit D-loop formation. The MHF experiments suggested that DNA binding alone was not sufficient for D-loop inhibition. This prompted us to analyze cGAS mutants for features essential for HR inhibition. We found that inhibition RAD51-mediated strand invasion by cGAS is due to its ability to self-oligomerize thereby condensing bound template dsDNA to a higher-order state less amenable to invasion by RAD51 filaments. Therefore inhibition of RAD51-mediated strand invasion by cGAS and not MHF could be explained by inherent differences in their ability to condense bound DNA via self-oligomerization.

**Suggested Editorial changes:**

**- The introduction is quite brief and more background on the topics concerning this study would be highly beneficial to the general readership.**

**Response:** We have expanded the instruction as suggested.

**- Also, rationales behind experiments are sometimes lacking, for instance Figure 1a-c. What is the rational of studying low and high density cultures and +/- serum?**

**Response:** We have added more text to better explain the rationale for the experiments. The aim of the low and high density cultures in **Figure 1** was to study the effect of arresting cells at G0/G1 by contact inhibition at high density and to compare it with cycling cells at low density cultures (mainly at S/G2).

**- "DNA binding zinc finger" C396A/C397A mutant: please rephrase since the effect of the mutant is loss of DNA binding and it is a bit confusing as written.**

**Response:** We have rephrased as suggested.

**- P6 "due to the recruitment of these factor to chromatin upon DNA damage". These "factors"?**

**- Fig. S8E typo: "Proetin"**

**Response:** Thank you for spotting these typos. We have carefully gone through the text and corrected the typos.

## **Referee #2:**

### **Major points**

**Point #1: Are cGAS-deficient cells also more resistant to other genotoxic stresses, apart from IR? Such data would broaden the study.**

**Response:** Yes. cGAS Knockout (KO) cells are more resistant to other genotoxic stressor for example etoposide and doxorubicin. These data are part of an ongoing work on a separate project on the impact of nuclear cGAS in anti-tumor therapy. Therefore we request not to include data in the present manuscript primarily focused on describing the role and mechanisms of cGAS in DNA repair.

**Point #2. The authors suggest that cGAS is bound to chromatin "constantly" (Fig 5). Most of the evidence for this comes from experiments with overexpressed, GFP-tagged cGAS. Have the authors estimated how much endogenous cGAS protein molecules a cell contains, relative to the size of its DNA genome? Is cGAS essentially behaving like histones, binding the whole genome? It seems hard to imagine there is enough cGAS protein expressed. Alternatively, does cGAS bind specific regions in the genome, as suggested in PMID 30811988? At a minimum, this reference and PMIDs 30270045 & 28738408, which report assays on chromatin binding by cGAS, should be discussed.**

**Response:** We have demonstrated that endogenous cGAS is constantly present in the nucleus as chromatin-bound protein in more than 5 different cell types including BMDMs (Figure 1, Figure 2E, Figure 3C, Figure 6C, D), BMDMs, HeLa cells, Raw 264.7 macrophages, THP1 cells (Figure EV1D). We have analysed the abundance of chromatin-bound endogenous cGAS in BMDMs. It is very abundant (data not shown). However, here it is worth to emphasize that inhibition of RAD51-mediated strand invasion by cGAS is not simply via its binding to DNA but due to its ability to self-oligomerize and therefore condense dsDNA into a higher-order state. Therefore cGAS does not have to coat all possible DNA binding sites in the genome for this inhibition to occur. As discussed, our proposed mechanisms is perhaps analogous to that by proteins like Histone H1 that restrain HR-DNA repair by promoting chromatin compaction (e.g. PMID: 12820979, PMID: 24798879, PMID: 17613284). Similarly, as pointed out by the reviewer, we don't imagine that inhibition of HR-DNA repair such proteins requires them occupying all possible DNA binding sites in the genome.

**Point #3: In Figs 1F, S1 and S2, it would be helpful to use image analysis software to quantify the amount of nuclear cGAS across a large number of cells.**

**Response:** We have performed the quantification of nuclear cGAS as suggested. Please see Figure 1A-C, and Figure EV2B).

**Point #4: Please provide a supplementary figure outlining the gating strategy for Fig. 3.**

**Response:** We have included the gating strategy as suggested. Please see Appendix Fig S3.

**Point #5: Please provide protein gels showing purity of the proteins used in the assay shown in Fig. 6.**

**Response:** We have included the protein gels showing purity of cGAS and component used in D-loop assay. Please see Figure EV5A.

**Minor points**

**6. In the title, please replace "hence" with "and".**

**Response:** We have changed the title as suggested.

**7. cGAS is the abbreviation for "cGAMP synthase" or "cyclic GMP-AMP synthase", not "cyclic cGMP-AMP synthase". Please correct abstract and introduction.**

**Response:** We have made the correction as suggested.

**8. On page 7, please refer to Fig S9E and S9F (not S10E and S10F)**

**Response:** We have carefully gone through the manuscript and ensured that the Figures are correctly called out.

**9. Could the authors provide a reference for BMDMos? Using cells from BMDM cultures at an early timepoint seems unusual. What is the phenotype of these cells?**

**Response:** The standard protocols for generating bone marrow derived macrophages (BMDMs) is to culture bone marrow cells in 20% L929 conditioned medium for 10 days. To generate bone marrow differentiating monocytes (BMDMos), we culture bone marrow cells in 20% L929 conditioned medium for 4-5 days. In contrast to the terminally differentiated macrophages (BMDMs), BMDMos are cycling cells with monocyte phenotype. We do not have a specific reference but this is the protocol that established and have successfully been using in our lab for many years. We have described this in the manuscript

**10. Fig S9 should be moved into the main manuscript to form Fig 7.**

**Response:** We have done as suggested.

**11. Please cite and briefly discuss PMID 28279982, which shows that cGAS-STING induce ISGs after IR.**

**Response:** We have cited this work.

**12. Please cite and briefly discuss PMID 30827685, which shows that cGAS is localised at the plasma membrane and suggests that nuclear localization may be an artefact of cell lysate preparation.**

**Response:** We have cited this study.

2nd Editorial Decision

12<sup>th</sup> August 2019

---

Thank you for submitting your revised manuscript for our consideration. I have now gone through the revised manuscript and assessed your responses to the referee reports, and I am pleased to see that all scientific issues have been satisfactorily addressed. We should therefore be ready to accept the study for publication in The EMBO Journal, pending several remaining formal/editorial modifications.

2nd Revision - authors' response

19<sup>th</sup> August 2019

---

Thank you for the offer to accept our work for publication in the EMBO Journal. We have now made the suggested editorial changes which you will find highlighted in correction mode.

Accepted

2nd September 2019

---

Thank you for submitting your final revised manuscript for our consideration. I am pleased to inform you that we have now accepted it for publication in The EMBO Journal.

Corresponding Author Name: Nelson Ongondo Gekara

Journal Submitted to: EMBO Journal

Manuscript Number: EMBOJ-2019-102718

## Reporting Checklist For Life Sciences Articles (Rev. June 2017)

This checklist is used to ensure good reporting standards and to improve the reproducibility of published results. These guidelines are consistent with the Principles and Guidelines for Reporting Preclinical Research issued by the NIH in 2014. Please follow the journal's authorship guidelines in preparing your manuscript.

## A- Figures

## 1. Data

## The data shown in figures should satisfy the following conditions:

- the data were obtained and processed according to the field's best practice and are presented to reflect the results of the experiments in an accurate and unbiased manner.
- figure panels include only data points, measurements or observations that can be compared to each other in a scientifically meaningful way.
- graphs include clearly labeled error bars for independent experiments and sample sizes. Unless justified, error bars should not be shown for technical replicates.
- if  $n \leq 5$ , the individual data points from each experiment should be plotted and any statistical test employed should be justified
- Source Data should be included to report the data underlying graphs. Please follow the guidelines set out in the author ship guidelines on Data Presentation.

## 2. Captions

## Each figure caption should contain the following information, for each panel where they are relevant:

- a specification of the experimental system investigated (eg cell line, species name).
- the assay(s) and method(s) used to carry out the reported observations and measurements
- an explicit mention of the biological and chemical entity(ies) that are being measured.
- an explicit mention of the biological and chemical entity(ies) that are altered/varied/perturbed in a controlled manner.
- the exact sample size (n) for each experimental group/condition, given as a number, not a range;
- a description of the sample collection allowing the reader to understand whether the samples represent technical or biological replicates (including how many animals, litters, cultures, etc.).
- a statement of how many times the experiment shown was independently replicated in the laboratory.
- definitions of statistical methods and measures:
  - common tests, such as t-test (please specify whether paired vs. unpaired), simple  $\chi^2$  tests, Wilcoxon and Mann-Whitney tests, can be unambiguously identified by name only, but more complex techniques should be described in the methods section;
  - are tests one-sided or two-sided?
  - are there adjustments for multiple comparisons?
  - exact statistical test results, e.g., P values = x but not P values < x;
  - definition of 'center values' as median or average;
  - definition of error bars as s.d. or s.e.m.

Any descriptions too long for the figure legend should be included in the methods section and/or with the source data.

In the pink boxes below, please ensure that the answers to the following questions are reported in the manuscript itself. Every question should be answered. If the question is not relevant to your research, please write NA (non applicable). We encourage you to include a specific subsection in the methods section for statistics, reagents, animal models and human subjects.

## B- Statistics and general methods

Please fill out these boxes ↓ (Do not worry if you cannot see all your text once you press return)

|                                                                                                                                                                                         |                                                                                                                                                                                                                                                                                                                                                                                              |
|-----------------------------------------------------------------------------------------------------------------------------------------------------------------------------------------|----------------------------------------------------------------------------------------------------------------------------------------------------------------------------------------------------------------------------------------------------------------------------------------------------------------------------------------------------------------------------------------------|
| 1.a. How was the sample size chosen to ensure adequate power to detect a pre-specified effect size?                                                                                     | For in vivo experiments each mouse represents one data point. A sample size of $n=3$ means that the data shown represent the mean value of 3 mice per experimental condition. In vitro experiments each data point is a biological replicate. The number of data points was used to calculate the P value for a given experiment. Statistical methods are reported in the "Methods" section. |
| 1.b. For animal studies, include a statement about sample size estimate even if no statistical methods were used.                                                                       | Each group included at least three mice ( $n=3$ )                                                                                                                                                                                                                                                                                                                                            |
| 2. Describe inclusion/exclusion criteria if samples or animals were excluded from the analysis. Were the criteria pre-established?                                                      | No inclusion/exclusion criteria used                                                                                                                                                                                                                                                                                                                                                         |
| 3. Were any steps taken to minimize the effects of subjective bias when allocating animals/samples to treatment (e.g. randomization procedure)? If yes, please describe.                | Mice were sex and age matched. For each experimental group included litters from different breeder pairs and cages.                                                                                                                                                                                                                                                                          |
| For animal studies, include a statement about randomization even if no randomization was used.                                                                                          | See above statement                                                                                                                                                                                                                                                                                                                                                                          |
| 4.a. Were any steps taken to minimize the effects of subjective bias during group allocation or/and when assessing results (e.g. blinding of the investigator)? If yes please describe. | Not blinded                                                                                                                                                                                                                                                                                                                                                                                  |
| 4.b. For animal studies, include a statement about blinding even if no blinding was done                                                                                                | Not blinded                                                                                                                                                                                                                                                                                                                                                                                  |
| 5. For every figure, are statistical tests justified as appropriate?                                                                                                                    | Yes. Statistics are included                                                                                                                                                                                                                                                                                                                                                                 |
| Do the data meet the assumptions of the tests (e.g., normal distribution)? Describe any methods used to assess it.                                                                      | The statistical test uses are indicated in the figure legends as well as Methods section.                                                                                                                                                                                                                                                                                                    |
| Is there an estimate of variation within each group of data?                                                                                                                            | No                                                                                                                                                                                                                                                                                                                                                                                           |
| Is the variance similar between the groups that are being statistically compared?                                                                                                       | N/A                                                                                                                                                                                                                                                                                                                                                                                          |

## C- Reagents

|                                                                                                                                                                                                                                                                                                                              |                                                                                                                                                                                                                                                                                                                                                                                                                                                                                                                                                                                                                                                                                                                                                                                                                                                                                                                                                                                                                                                                                                                                                                                                                                                                                                                                                               |
|------------------------------------------------------------------------------------------------------------------------------------------------------------------------------------------------------------------------------------------------------------------------------------------------------------------------------|---------------------------------------------------------------------------------------------------------------------------------------------------------------------------------------------------------------------------------------------------------------------------------------------------------------------------------------------------------------------------------------------------------------------------------------------------------------------------------------------------------------------------------------------------------------------------------------------------------------------------------------------------------------------------------------------------------------------------------------------------------------------------------------------------------------------------------------------------------------------------------------------------------------------------------------------------------------------------------------------------------------------------------------------------------------------------------------------------------------------------------------------------------------------------------------------------------------------------------------------------------------------------------------------------------------------------------------------------------------|
| 6. To show that antibodies were profiled for use in the system under study (assay and species), provide a citation, catalog number and/or clone number, supplementary information or reference to an antibody validation profile. e.g., Antibodypedia (see link list at top right), 1DegreeBio (see link list at top right). | anti- $\alpha$ -Tubulin Sigma-Aldrich Cat No. T5168. (Shafi Kuchay et al. Nature cell biology, 2013)<br>anti-p-ATM (Ser1981) Sigma-Aldrich Cat No. SAB4300100. (Jeongkyu Kim et al. Molecular cell, 2017)<br>anti-cGAS Santa Cruz Cat No. sc-515777. (Prabakaran, T. et al. EMBO J, 2018)<br>anti-GFP. Santa Cruz Cat No. sc-9996. (Wu, M.J. et al. Nat Commun, 2019)<br>anti-ATM Cell Signaling Technology Cat No. 2873. (Bo Qin. et al. Nat Commun, 2019)<br>anti-Flag Cell Signaling Technology Cat No. 14793. (Jenna M Gaska. et al. eLife, 2019)<br>anti-mouse cGAS Cell Signaling Technology Cat No. 91659. (Fuan Wang. et al. Nature Immunology, 2016)<br>anti-human cGAS Cell Signaling Technology Cat No. 15102. (Thaneas Prabakaran. et al. EMBO J, 2018)<br>anti-STING Cell Signaling Technology Cat No. 13647. (Markus Stempel. et al. EMBO J, 2019)<br>anti-MRE11 Cell Signaling Technology Cat No. 4895. (P van Morgen. et al. Oncogene, 2017)<br>anti-PARP1 Cell Signaling Technology Cat No. 9532. (Gang Cheng. et al. Nat Commun, 2019)<br>anti-H2A Cell Signaling Technology Cat No. 12349. (Krishna Kalyan Kolluri. et al. eLife, 2018)<br>anti-H2A.X Cell Signaling Technology Cat No. 2595. (Shengfu Piao. et al. Autophagy, 2017)<br>anti-y-H2A.X Cell Signaling Technology Cat No. 2577. (Gillian Dunphy. et al. Molecular Cell, 2018) |
|------------------------------------------------------------------------------------------------------------------------------------------------------------------------------------------------------------------------------------------------------------------------------------------------------------------------------|---------------------------------------------------------------------------------------------------------------------------------------------------------------------------------------------------------------------------------------------------------------------------------------------------------------------------------------------------------------------------------------------------------------------------------------------------------------------------------------------------------------------------------------------------------------------------------------------------------------------------------------------------------------------------------------------------------------------------------------------------------------------------------------------------------------------------------------------------------------------------------------------------------------------------------------------------------------------------------------------------------------------------------------------------------------------------------------------------------------------------------------------------------------------------------------------------------------------------------------------------------------------------------------------------------------------------------------------------------------|

## USEFUL LINKS FOR COMPLETING THIS FORM

|                                                                                                                                                                                                 |                                                         |
|-------------------------------------------------------------------------------------------------------------------------------------------------------------------------------------------------|---------------------------------------------------------|
| <a href="http://www.antibodypedia.com">http://www.antibodypedia.com</a>                                                                                                                         | Antibodypedia                                           |
| <a href="http://1degreebio.org">http://1degreebio.org</a>                                                                                                                                       | 1DegreeBio                                              |
| <a href="http://www.equator-network.org/reporting-guidelines/improving-bioscience-research-report">http://www.equator-network.org/reporting-guidelines/improving-bioscience-research-report</a> | ARRIVE Guidelines                                       |
| <a href="http://grants.nih.gov/grants/claw/claw.htm">http://grants.nih.gov/grants/claw/claw.htm</a>                                                                                             | NIH Guidelines in animal use                            |
| <a href="http://www.mrc.ac.uk/Ourresearch/Ethicsresearchguidance/Useofanimals/index.htm">http://www.mrc.ac.uk/Ourresearch/Ethicsresearchguidance/Useofanimals/index.htm</a>                     | MRC Guidelines on animal use                            |
| <a href="http://ClinicalTrials.gov">http://ClinicalTrials.gov</a>                                                                                                                               | Clinical Trial registration                             |
| <a href="http://www.consort-statement.org">http://www.consort-statement.org</a>                                                                                                                 | CONSORT Flow Diagram                                    |
| <a href="http://www.consort-statement.org/checklists/view/32-consort/66-title">http://www.consort-statement.org/checklists/view/32-consort/66-title</a>                                         | CONSORT Check List                                      |
| <a href="http://www.equator-network.org/reporting-guidelines/reporting-recommendations-for-tum">http://www.equator-network.org/reporting-guidelines/reporting-recommendations-for-tum</a>       | REMARK Reporting Guidelines (marker prognostic studies) |
| <a href="http://datadryad.org">http://datadryad.org</a>                                                                                                                                         | Dryad                                                   |
| <a href="http://figshare.com">http://figshare.com</a>                                                                                                                                           | Figshare                                                |
| <a href="http://www.ncbi.nlm.nih.gov/gap">http://www.ncbi.nlm.nih.gov/gap</a>                                                                                                                   | dbGAP                                                   |
| <a href="http://www.ebi.ac.uk/ega">http://www.ebi.ac.uk/ega</a>                                                                                                                                 | EGA                                                     |
| <a href="http://biomodels.net/">http://biomodels.net/</a>                                                                                                                                       | Biomodels Database                                      |
| <a href="http://biomodels.net/miriam/">http://biomodels.net/miriam/</a>                                                                                                                         | MIRIAM Guidelines                                       |
| <a href="http://jji.biochem.sun.ac.za">http://jji.biochem.sun.ac.za</a>                                                                                                                         | JWS Online                                              |
| <a href="http://aba.od.nih.gov/biosecurity/biosecurity_documents.html">http://aba.od.nih.gov/biosecurity/biosecurity_documents.html</a>                                                         | Biosecurity Documents from NIH                          |
| <a href="http://www.selectagents.gov/">http://www.selectagents.gov/</a>                                                                                                                         | List of Select Agents                                   |



|                                                                                                                                                       |                                                                                                                                                                                                                                                                                                                                                                                                                                                                                                                                                                                                                                                                                                                                                                                                                                                                                                   |
|-------------------------------------------------------------------------------------------------------------------------------------------------------|---------------------------------------------------------------------------------------------------------------------------------------------------------------------------------------------------------------------------------------------------------------------------------------------------------------------------------------------------------------------------------------------------------------------------------------------------------------------------------------------------------------------------------------------------------------------------------------------------------------------------------------------------------------------------------------------------------------------------------------------------------------------------------------------------------------------------------------------------------------------------------------------------|
| 6. Continued                                                                                                                                          | anti-p-IRF3 Cell Signaling Technology Cat No. 29047. (Ziyang Wang, et al. Cell Reports, 2019)<br>anti-IRF3 Cell Signaling Technology Cat No. 4302. (Kunli Zhang, et al. Cell Reports, 2019)<br>anti-Rad51 Abcam Cat No. ab133534. (Kondrashova O, et al. Nat Commun, 2018).<br>anti-Lamin B1 Abcam Cat No. ab133741. (Xiahou Z et al. Nat Commun, 2017)<br>PE-Cy7 Rat anti-Mouse CD117(c-Kit) BD Cat No.561681<br>Ly-6A/E (Sca-1) Monoclonal Antibody (D7), FITC, eBioscience™ Catalog # 11-5981-82. (Moretti FA, et al. eLife, 2018)<br>Alexa Fluor® 700 Rat anti-Mouse CD45R(B220) Clone RA3-6B2 BD. Catalog No. 557957. (Allman DM, et al. J Immunol, 1992)<br>Ly-6G/Ly-6C Monoclonal Antibody (Gr1), FITC, eBioscience™ Catalog # 11-5931-82. (Authors Vegas AJ, et al. Nature biotechnology, 2016)<br>V450 Rat Anti-Mouse Ly-6G BD. Catalog No. 560603. (Fleming TJ, et al. J Immunol, 1993) |
| 7. Identify the source of cell lines and report if they were recently authenticated (e.g., by STR profiling) and tested for mycoplasma contamination. | We've used the following cell lines: HEK293(ATCC), HEK293T(ATCC), U-2 OS (ATCC), HeLa(ATCC), Raw 264.7(ATCC), THP-1(ATCC), primary cell BMDMs and BMDMs. All cell lines and primary cells are routinely checked in our lab for mycoplasma contamination.                                                                                                                                                                                                                                                                                                                                                                                                                                                                                                                                                                                                                                          |

\* for all hyperlinks, please see the table at the top right of the document

D-

|                                                                                                                                                                                                                                                                                                                                                                                    |                                                                                                                                                                                                                                                                                                                                                                                                                                                                              |
|------------------------------------------------------------------------------------------------------------------------------------------------------------------------------------------------------------------------------------------------------------------------------------------------------------------------------------------------------------------------------------|------------------------------------------------------------------------------------------------------------------------------------------------------------------------------------------------------------------------------------------------------------------------------------------------------------------------------------------------------------------------------------------------------------------------------------------------------------------------------|
| 8. Report species, strain, gender, age of animals and genetic modification status where applicable. Please detail housing and husbandry conditions and the source of animals.                                                                                                                                                                                                      | All the mice in this study were on pure C57BL/6 background and age is between 8 weeks to 12 weeks. Sting-/- (C57BL/6-Tmem173gt/J) (Sauer, Sotelo-Troha et al., 2011) and cGAS-/- (B6(C)-Mbl21d1mtd (EUCOMM) Hmgul/J) (Schoggins, MacDuff et al., 2014) were from Jackson Laboratory. cGAS-/-Sting-/- mice were generated by interbreeding cGAS-/-with Sting-/- mice. Mice were bred in specific pathogen-free animal facility of Umeå center for comparative Biology (UCCB). |
| 9. For experiments involving live vertebrates, include a statement of compliance with ethical regulations and identify the committee(s) approving the experiments.                                                                                                                                                                                                                 | The experiments were approved and carried out according to the guidelines set out by the Umeå Regional Animal Ethic Committee (Umeå Regionala Djurförsöksetiska Nämnd), Approval no. A53-14.                                                                                                                                                                                                                                                                                 |
| 10. We recommend consulting the ARRIVE guidelines (see link list at top right) (PLOS Biol. 8(6), e1000412, 2010) to ensure that other relevant aspects of animal studies are adequately reported. See author guidelines, under 'Reporting Guidelines'. See also: NIH (see link list at top right) and MRC (see link list at top right) recommendations. Please confirm compliance. | We confirm that we used the ARRIVE guidelines.                                                                                                                                                                                                                                                                                                                                                                                                                               |

E-

|                                                                                                                                                                                                                                                                                                                    |                                                                                                     |
|--------------------------------------------------------------------------------------------------------------------------------------------------------------------------------------------------------------------------------------------------------------------------------------------------------------------|-----------------------------------------------------------------------------------------------------|
| 11. Identify the committee(s) approving the study protocol.                                                                                                                                                                                                                                                        | Umeå Regional Animal Ethic Committee (Umeå Regionala Djurförsöksetiska Nämnd), Approval no. A53-14. |
| 12. Include a statement confirming that informed consent was obtained from all subjects and that the experiments conformed to the principles set out in the WMA Declaration of Helsinki and the Department of Health and Human Services Belmont Report.                                                            | N/A                                                                                                 |
| 13. For publication of patient photos, include a statement confirming that consent to publish was obtained.                                                                                                                                                                                                        | N/A                                                                                                 |
| 14. Report any restrictions on the availability (and/or on the use) of human data or samples.                                                                                                                                                                                                                      | N/A                                                                                                 |
| 15. Report the clinical trial registration number (at ClinicalTrials.gov or equivalent), where applicable.                                                                                                                                                                                                         | N/A                                                                                                 |
| 16. For phase II and III randomized controlled trials, please refer to the CONSORT flow diagram (see link list at top right) and submit the CONSORT checklist (see link list at top right) with your submission. See author guidelines, under 'Reporting Guidelines'. Please confirm you have submitted this list. | N/A                                                                                                 |
| 17. For tumor marker prognostic studies, we recommend that you follow the REMARK reporting guidelines (see link list at top right). See author guidelines, under 'Reporting Guidelines'. Please confirm you have followed these guidelines.                                                                        | N/A                                                                                                 |

F-

|                                                                                                                                                                                                                                                                                                                                                                                                                                                                                                                                                                                                                                                                                                   |     |
|---------------------------------------------------------------------------------------------------------------------------------------------------------------------------------------------------------------------------------------------------------------------------------------------------------------------------------------------------------------------------------------------------------------------------------------------------------------------------------------------------------------------------------------------------------------------------------------------------------------------------------------------------------------------------------------------------|-----|
| 18. Provide a "Data Availability" section at the end of the Materials & Methods, listing the accession codes for data generated in this study and deposited in a public database (e.g. RNA-Seq data: Gene Expression Omnibus GSE39462, Proteomics data: PRIDE PXD000208 etc.) Please refer to our author guidelines for 'Data Deposition'.<br><br>Data deposition in a public repository is mandatory for:<br>a. Protein, DNA and RNA sequences<br>b. Macromolecular structures<br>c. Crystallographic data for small molecules<br>d. Functional genomics data<br>e. Proteomics and molecular interactions                                                                                        | N/A |
| 19. Deposition is strongly recommended for any datasets that are central and integral to the study; please consider the journal's data policy. If no structured public repository exists for a given data type, we encourage the provision of datasets in the manuscript as a Supplementary Document (see author guidelines under 'Expanded View' or in unstructured repositories such as Dryad (see link list at top right) or Figshare (see link list at top right).                                                                                                                                                                                                                            | N/A |
| 20. Access to human clinical and genomic datasets should be provided with as few restrictions as possible while respecting ethical obligations to the patients and relevant medical and legal issues. If practically possible and compatible with the individual consent agreement used in the study, such data should be deposited in one of the major public access-controlled repositories such as dbGAP (see link list at top right) or EGA (see link list at top right).                                                                                                                                                                                                                     | N/A |
| 21. Computational models that are central and integral to a study should be shared without restrictions and provided in a machine-readable form. The relevant accession numbers or links should be provided. When possible, standardized format (SBML, CellML) should be used instead of scripts (e.g. MATLAB). Authors are strongly encouraged to follow the MIRIAM guidelines (see link list at top right) and deposit their model in a public database such as Biocompare (see link list at top right) or JWS Online (see link list at top right). If computer source code is provided with the paper, it should be deposited in a public repository or included in supplementary information. | N/A |

G-

|                                                                                                                                                                                                                                                                                               |    |
|-----------------------------------------------------------------------------------------------------------------------------------------------------------------------------------------------------------------------------------------------------------------------------------------------|----|
| 22. Could your study fall under dual use research restrictions? Please check biosecurity documents (see link list at top right) and list of select agents and toxins (APHIS/CDC) (see link list at top right). According to our biosecurity guidelines, provide a statement only if it could. | No |
|-----------------------------------------------------------------------------------------------------------------------------------------------------------------------------------------------------------------------------------------------------------------------------------------------|----|
